# Supplementary material for: COVID-19 Vaccine and Social Media in the U.S.: Exploring Emotions and Discussions on Twitter
Source: MDPI journal article supplement (doi:10.3390/vaccines9101059), 2021-09-23
Supplement: s1 [file s1]

**Supplementary Table S1.** Topics and Examples of Tweets. Products and people were replaced by [].

| ID  | Topic                                    | Example                                                                                                                                                                                                                                                             |
|-----|------------------------------------------|---------------------------------------------------------------------------------------------------------------------------------------------------------------------------------------------------------------------------------------------------------------------|
| T1  | Vaccine Exemption Bill                   | Colorado [] wrote legislation that would put Americans in forced reeducation simply for refusing a vaccine including untested DNA altering vaccines. No media outlet covered it no politicians condemned the legislation Easy to verify                             |
| T2  | Vaccine Distribution                     | We can't deliver administer vaccines efficiently effectively nationwide either We never learn what to do as a fed action decentralized or privatized Pandemic was a national emergency needed a national vaccine rollout like a cat 5 hurricane hitting everywhere  |
| T3  | Death and Vaccine                        | Miami doctor dies within weeks of receiving [] Covid19 vaccine Miami obstetrician Gregory Michael 58 died after a catastrophic reaction to the [] Covid19 vaccine                                                                                                   |
| T4  | Vaccine Information Sharing              | Need fair balance information on safety C19 vax safety Doctors should weigh decision with patients on risks and benefits C19 recovered children pregnant women lowrisk should defer                                                                                 |
| T5  | Politician Hoax                          | Its a hoax [] rushes to first in line for vaccine Selfish selfcentered hypocrite [] [] Coward                                                                                                                                                                       |
| T6  | Vaccination Sites                        | Monday s vaccination appointments at Alamodome WellMed clinics rescheduled due to expected wintry weather in San Antonio KSAT San Antonio                                                                                                                           |
| T7  | Vaccination Hesitancy                    | The problem with saying this is it makes people feel the vaccine doesn't matter If you want people to get and trust the vaccine saying nothing will change if you get it or not isn't going to help in that cause                                                   |
| T8  | Emergency Approval of Vaccines           | FDA Panel Says [] PFE Vaccine s Benefits Outweigh Risks A panel for FDA advisers voted in favor of [] and [] s covid19 vaccine on grounds that its benefits outweigh risks. The vote was 17 to 4 with one abstention                                                |
| T9  | Vaccines' Mechanism                      | My understanding is the [] vaccine is not a weakened virus. It is the mRNA of the virus. This mRNA enters the cells and then replicates another component of the virus the spike protein Antibodies are produced to attack these spike proteins in future exposures |
| T10 | Vaccine for Teachers                     | Teachers should be in a priority group for the vaccine. Virtual learning is not working for the students. I work in college admissions. These kids are not performing academically. Teachers tell me this                                                           |
| T11 | Vaccination, Mask, and Social Distancing | My masking does not protect me it protects you from me and your masking protects me from you. Please wash your hands wear a mask stay home if sick and get the vaccine if you can Thank you                                                                         |
| T12 | Vaccine Immunity                         | Some early evidence suggests natural immunity may not last very long. We wont know how long immunity produced by vaccination lasts until we have more data on how well the vaccines work                                                                            |
| T13 | Vaccine Effectiveness                    | South Africa is suspending its rollout of the [] vaccine after initial trials showed disappointing results against the B1351 variant of COVID19                                                                                                                     |

|     |                                                           |                                                                                                                                                                                                                                                                                    |
|-----|-----------------------------------------------------------|------------------------------------------------------------------------------------------------------------------------------------------------------------------------------------------------------------------------------------------------------------------------------------|
| T14 | Friends and Family Vaccination                            | The nursing home called me today to ask if I wanted my mother to get the COVID vaccine. Oh please please please give it to her as soon as you can. I told them I haven't hugged my mother since March. She's 96yrs old and I don't know how much time I have left with her         |
| T15 | Vaccination and Election                                  | [ ] voters rewarded Pres [ ] successful warp speed Vaccine program by kicking him out after 2 attempted coups by the corrupt [ ] the Russian Hoax and false impeachment. Finally the cheating rigged election has done the job. The fake media lies and coverup did its dirty deed |
| T16 | Trump Administration Performance                          | The response from the [ ] Administration was so pathetic it cost thousands of Americans their lives [ ] going down in the history books as the KILLER PRESIDENT. He thought he'd come rushing in on his white horse and save the day with a vaccine 330 thousand dead Americans    |
| T17 | Vaccine Development Timeline                              | We knew it was coming but we didn't know it was going to be this year. We all thought maybe next year or years from now as it usually takes 45 years to create a vaccine and then get it approved. At the start of the pandemic we never thought to see a vaccine this soon        |
| T18 | Vaccination for Health Workers and Nursing Home Residents | Health care workers and nursing home residents should be at the front of the line when the first coronavirus vaccine shots become available an influential government advisory panel said Tuesday                                                                                  |
| T19 | Vaccine Management                                        | FDA says [ ] vaccine vials hold extra doses expanding supply Using every drop from overfilled vials could boost available doses by up to 40 percent                                                                                                                                |
| T20 | Travel Mandatory Testing and Vaccine                      | Beginning Nov 24 anyone flying to Hawaii will have to show a negative COVID19 test before their departure no matter the airline they fly in onwhile [ ] airline [ ] will require proof of vaccination to fly                                                                       |
| T21 | Getting Vaccines Stories                                  | I got my appoint today for 2nd dose thru email from HHD COVID19 Vaccine 2nd Dose Confirmation Good news for all those waiting on appointment for 2nd dose                                                                                                                          |
| T22 | Vaccination Impact on Market                              | Markets have spent November celebrating upbeat vaccine news and closure on US election uncertainty After a strong month are equities headed for another reset                                                                                                                      |
| T23 | Biden vs. Trump on Vaccine                                | [ ] scientific advisers will meet with vaccine makers in coming days as the presidential transition remains stalled because of President [ ]'s refusal to acknowledge that he lost the election                                                                                    |
| T25 | Supporting Pharmaceutical Companies                       | He signed the national vaccine injury compensation bill that exempts vaccine makers from liability for childhood vaccinations No surprise there                                                                                                                                    |
| T26 | Vaccine Side Effects                                      | Update on my second dose of the [ ] vaccine. Got vaccinated at 12ish yesterday and felt achy and drained by the evening. Took some Ibuprofen and actually felt better before bed. Today felt completely normal other than a sore arm where I received the shot Feeling lucky       |
